# Supplementary material for: Comparison of risks of cardiovascular events in the elderly using standard survival analysis and multiple-events and recurrent-events methods
Source: PubMed Central journal article supplement (PMC4364095; doi:10.1186/s12874-015-0004-3), 2015-03-08

Additional Table: Estimates of hazard ratios for four respective models and 95% confidence limits.

| Effect              | Model 1 |      |      | Model 2 |      |      | Model 3 |      |      | Model 4 |      |      |
|---------------------|---------|------|------|---------|------|------|---------|------|------|---------|------|------|
|                     | Est     | LL   | UL   | Est     | LL   | UL   | Est     | LL   | UL   | Est     | LL   | UL   |
| Hypertension drug   | 1.12    | 1.04 | 1.20 | 1.36    | 1.21 | 1.53 | 1.11    | 1.07 | 1.16 | 1.37    | 1.22 | 1.54 |
| Male                | 1.20    | 1.11 | 1.30 | 1.51    | 1.33 | 1.71 | 1.20    | 1.15 | 1.26 | 1.51    | 1.33 | 1.72 |
| Age                 | 1.05    | 1.04 | 1.06 | 1.10    | 1.08 | 1.11 | 1.05    | 1.05 | 1.06 | 1.10    | 1.09 | 1.11 |
| BMI2                | 0.91    | 0.84 | 0.98 | 0.80    | 0.70 | 0.90 | 0.91    | 0.87 | 0.95 | 0.80    | 0.71 | 0.91 |
| BMI3                | 0.87    | 0.79 | 0.96 | 0.78    | 0.66 | 0.91 | 0.88    | 0.83 | 0.93 | 0.78    | 0.66 | 0.92 |
| Afr.Am race         | 1.14    | 1.03 | 1.26 | 1.40    | 1.19 | 1.65 | 1.22    | 1.15 | 1.29 | 1.39    | 1.19 | 1.64 |
| Former smoker       | 1.11    | 1.03 | 1.20 | 1.18    | 1.05 | 1.33 | 1.11    | 1.06 | 1.15 | 1.18    | 1.05 | 1.33 |
| Current smoker      | 1.44    | 1.29 | 1.61 | 1.93    | 1.62 | 2.30 | 1.44    | 1.35 | 1.53 | 1.93    | 1.62 | 2.31 |
| SBP                 | 1.00    | 1.00 | 1.00 | 1.00    | 1.00 | 1.01 | 1.00    | 1.00 | 1.00 | 1.00    | 1.00 | 1.01 |
| Cholesterol         | 0.99    | 0.98 | 1.00 | 0.99    | 0.97 | 1.00 | 0.99    | 0.99 | 1.00 | 0.99    | 0.97 | 1.00 |
| HDL                 | 0.98    | 0.96 | 1.01 | 0.99    | 0.95 | 1.03 | 0.99    | 0.97 | 1.00 | 0.99    | 0.95 | 1.03 |
| Diabetes            | 1.36    | 1.25 | 1.48 | 1.83    | 1.59 | 2.10 | 1.36    | 1.30 | 1.43 | 1.84    | 1.60 | 2.12 |
| Family CVD history  | 0.97    | 0.91 | 1.05 | 0.96    | 0.86 | 1.08 | 1.00    | 0.96 | 1.04 | 0.96    | 0.85 | 1.08 |
| Education           | 0.96    | 0.93 | 0.98 | 0.91    | 0.88 | 0.95 | 0.96    | 0.95 | 0.98 | 0.91    | 0.88 | 0.95 |
| Lipid Lowering Drug | 1.01    | 0.87 | 1.17 | 0.96    | 0.76 | 1.22 | 1.00    | 0.93 | 1.09 | 0.96    | 0.75 | 1.21 |
| Prior CVD           | 1.39    | 1.28 | 1.50 | 1.74    | 1.53 | 1.97 | 1.27    | 1.21 | 1.32 | 1.74    | 1.54 | 1.98 |

Est = Estimate; LL= Lower limit of 95% confidence interval; UL=Upper limit of 95% confidence interval; BMI2= overweight (BMI 25-29.9) , BMI 3=obese (BMI $\geq$ 30)

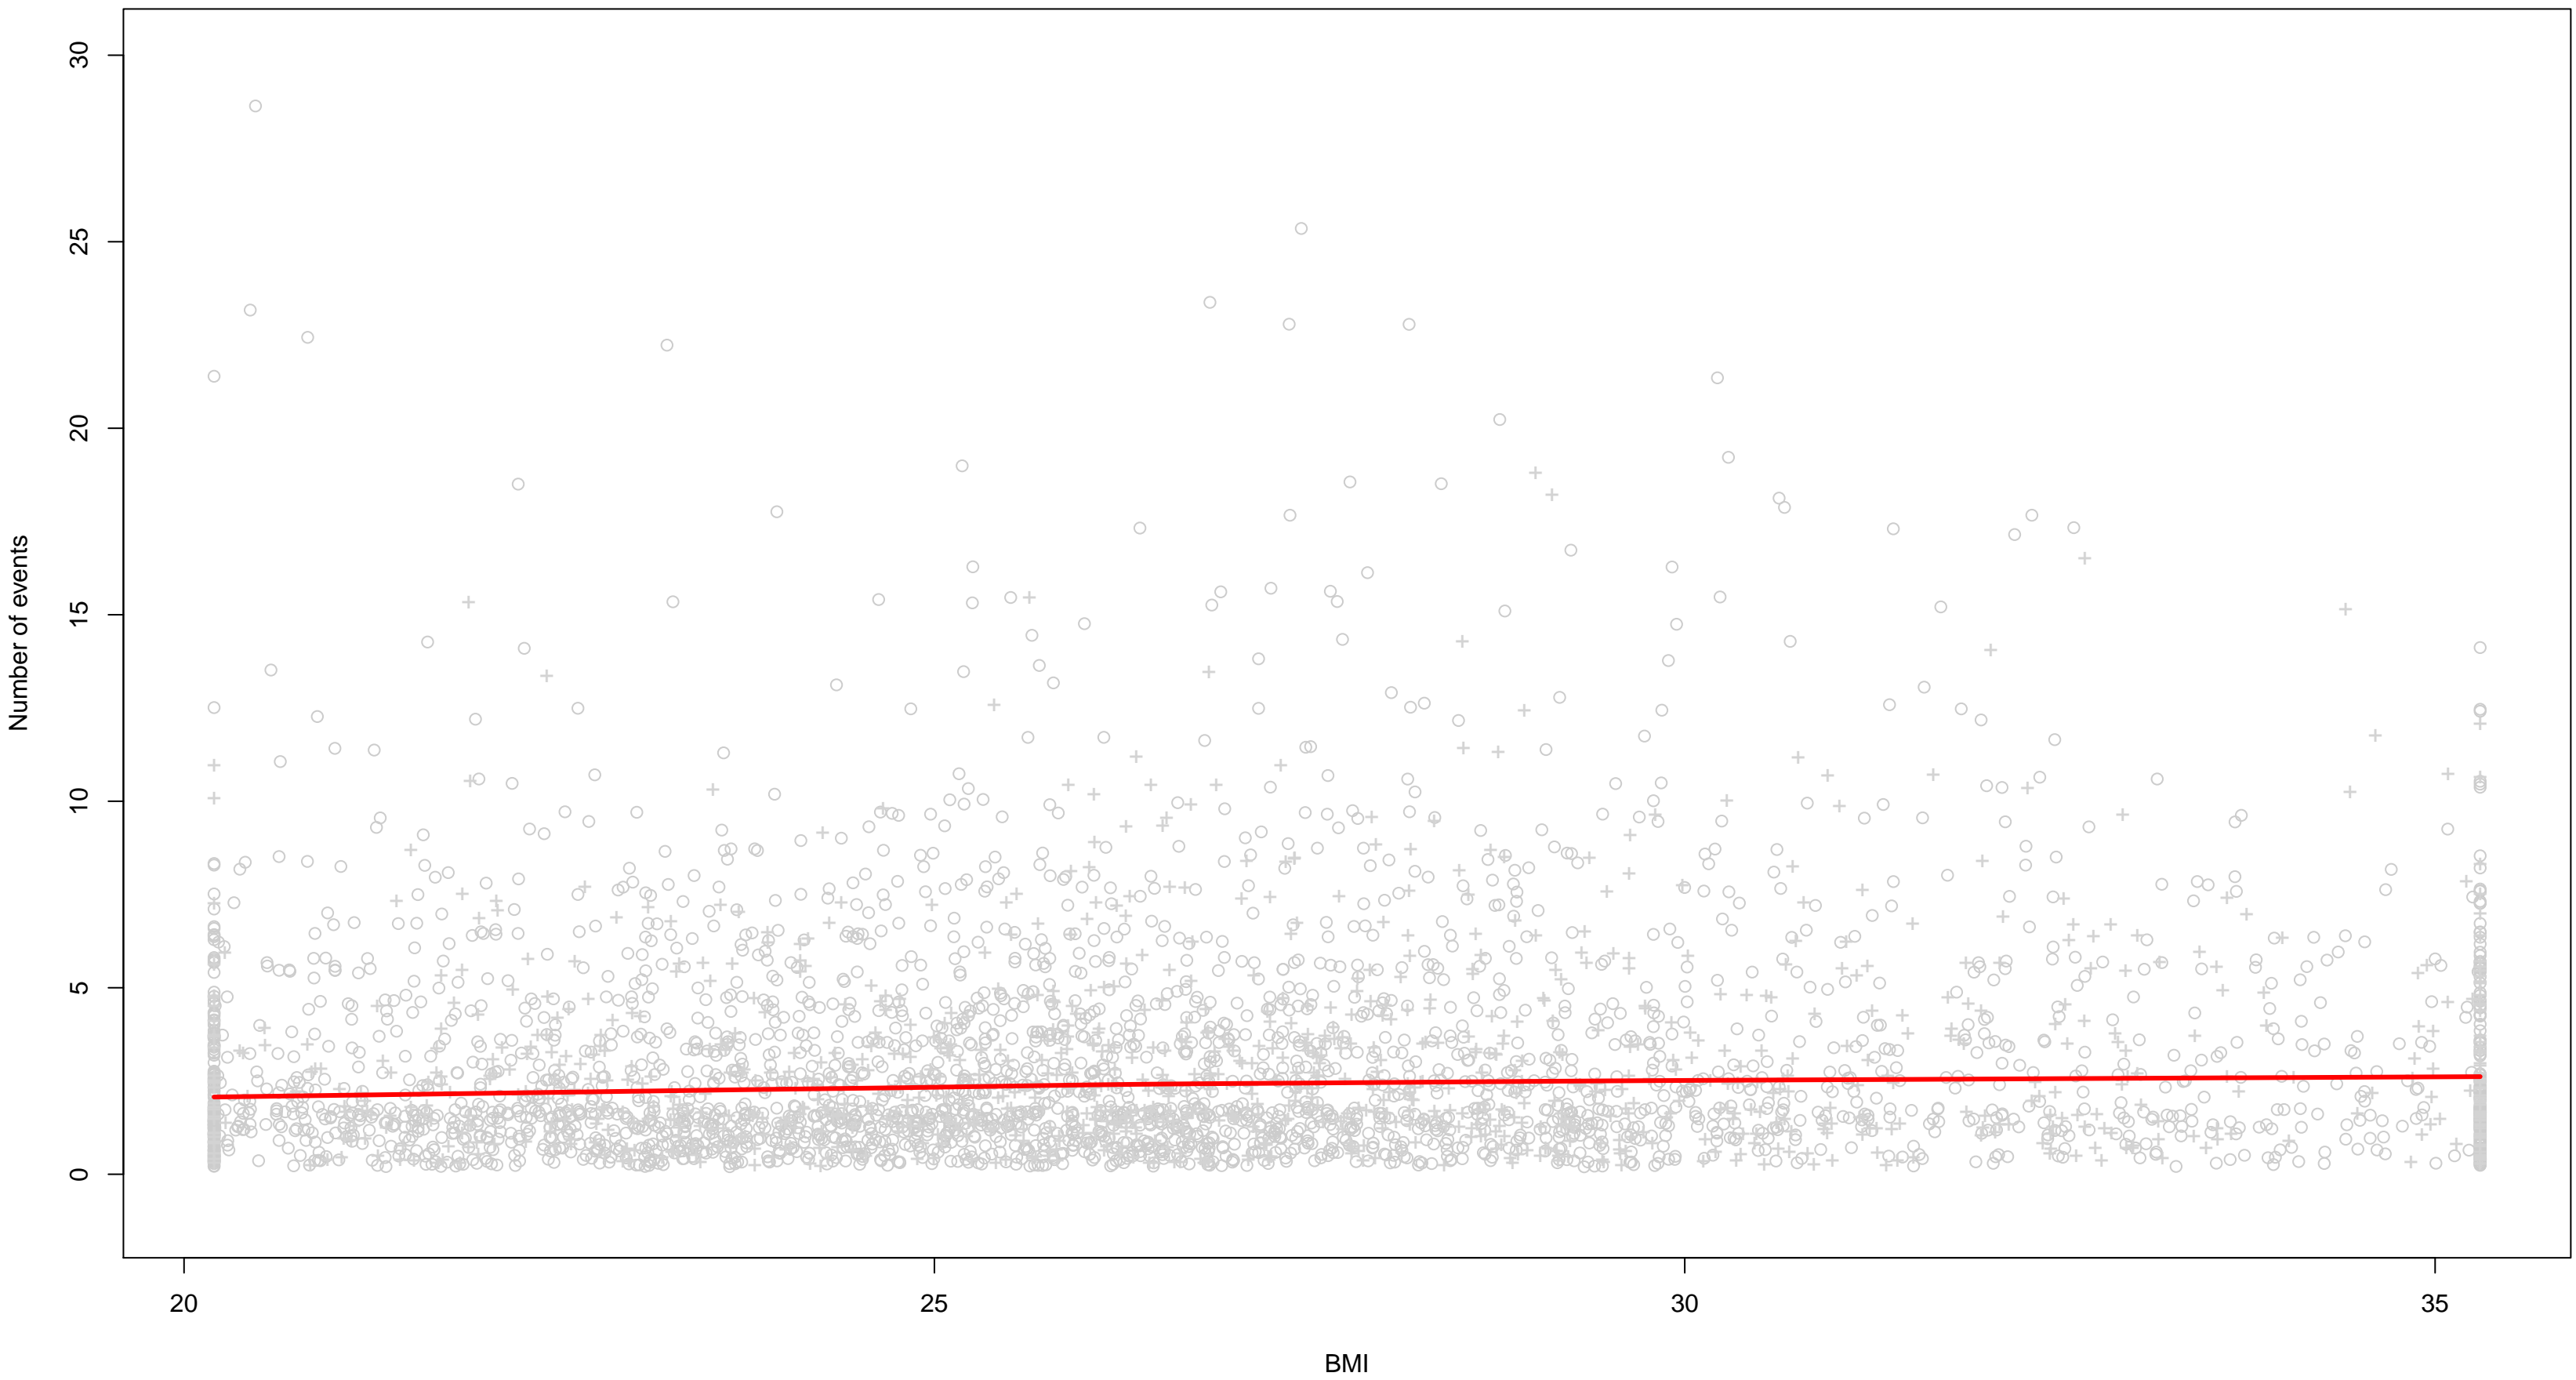

Supplement: 12874_2015_4_MOESM1_ESM.pdf [file 12874_2015_4_MOESM1_ESM.pdf]
